# Supplementary material
Source: publisher figshare collection journal article supplement (https://acs.figshare.com/ndownloader/files/16252232)
Supplement: Supplementary file 1 [file 16252232]

## Supporting information

### **Synergistic Effect of Pseudo-Halide Thiocyanate Anion and Cesium Cation on Realizing High-Performance Pinhole Free MA-Based Wide-Band Gap Perovskites**

*Yue-Min Xie,<sup>†,‡,§</sup> Xiuwen Xu,<sup>†,‡,§</sup> Chunqing Ma,<sup>‡</sup> Menglin Li,<sup>†,‡,§</sup> Yuhui Ma<sup>†,‡,§</sup> Chun-Sing Lee,<sup>‡</sup> and Sai-Wing Tsang<sup>\*,†,‡,§</sup>*

<sup>†</sup>Department of Materials Science and Engineering and <sup>‡</sup>Center of Super-Diamond and Advanced Films (COSDAF), City University of Hong Kong, Kowloon, Hong Kong SAR, P. R. China

<sup>§</sup>City University of Hong Kong Shenzhen Research Institute, Shenzhen 518057, P. R. China

#### **Corresponding Author**

\* E-mail: [saitsang@cityu.edu.hk](mailto:saitsang@cityu.edu.hk)

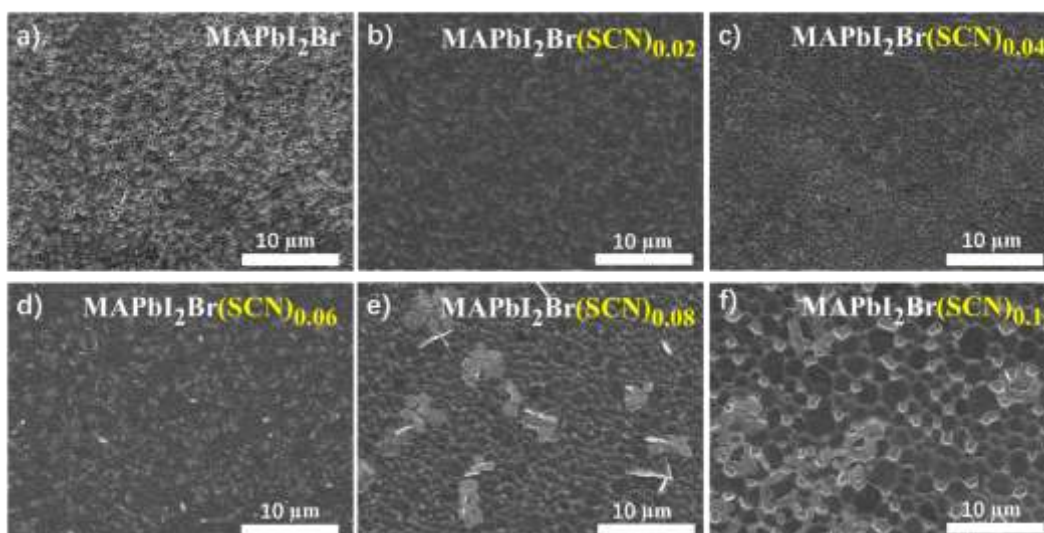

**Figure S1.** Large-scale SEM images of MAPbI<sub>2</sub>Br perovskites with the Pb(SCN)<sub>2</sub> additive ratio of a) 0, b) 1%, c) 2%, d) 3%, e) 4% and f) 5%, respectively.

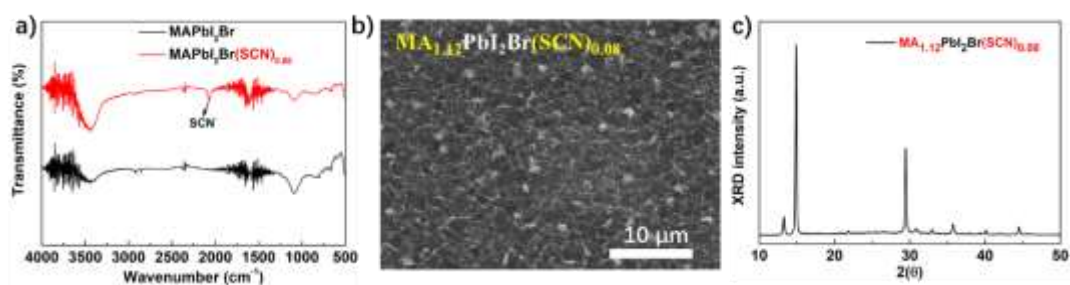

**Figure S2.** a) FTIR spectra of MAPbI<sub>2</sub>Br and MAPbI<sub>2</sub>Br(SCN)<sub>0.08</sub>, respectively. b-c) SEM and XRD results of film prepared with precursor solution of MA<sub>1.12</sub>PbI<sub>2</sub>Br(SCN)<sub>0.08</sub>.

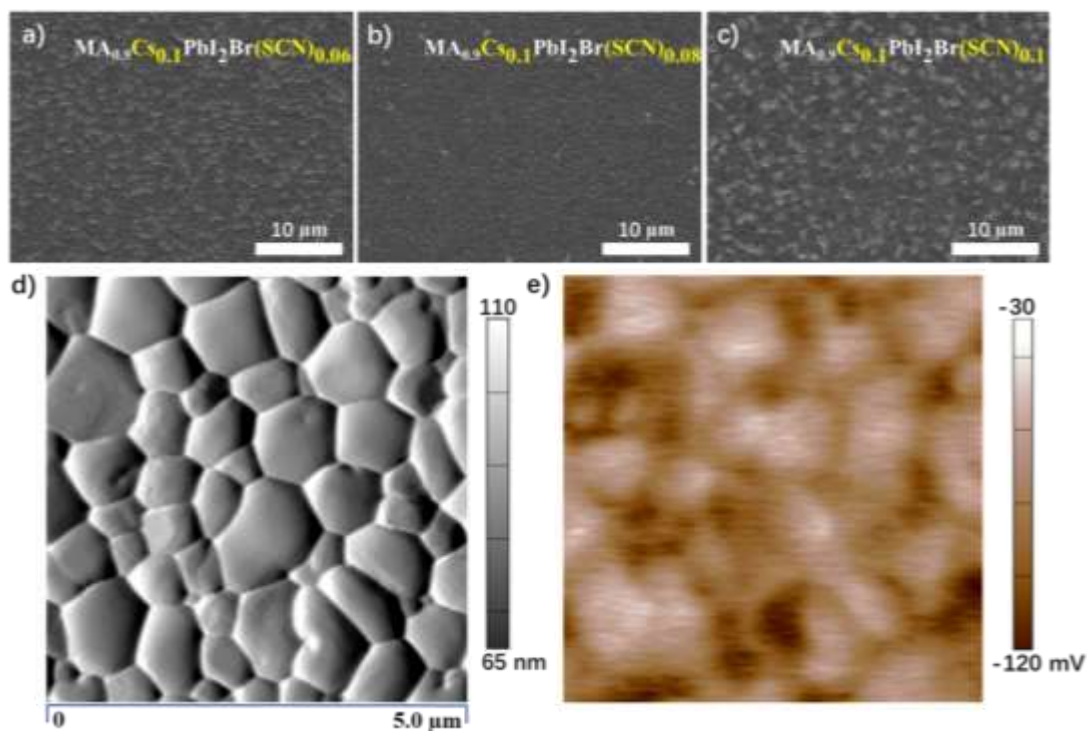

**Figure S3.** a-c) Large-scale SEM images of perovskite film prepared with precursor solution of  $\text{MA}_{0.9}\text{Cs}_{0.1}\text{PbI}_2\text{Br}(\text{SCN})_{0.06}$ ,  $\text{MA}_{0.9}\text{Cs}_{0.1}\text{PbI}_2\text{Br}(\text{SCN})_{0.08}$  and  $\text{MA}_{0.9}\text{Cs}_{0.1}\text{PbI}_2\text{Br}(\text{SCN})_{0.1}$ , respectively. d) AFM topography and e) the contact potential difference (CPD) maps of film  $\text{MA}\text{PbI}_2\text{Br}(\text{SCN})_{0.08}$ .

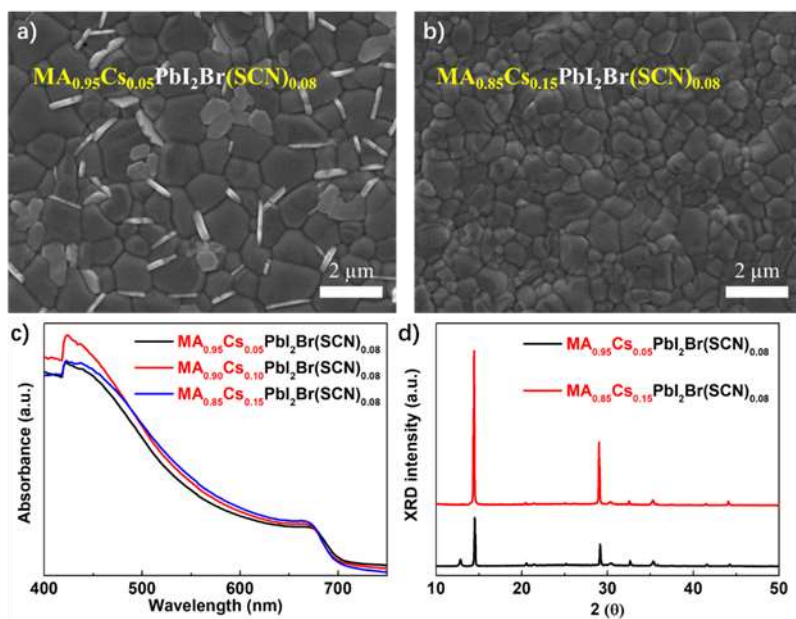

**Figure S4.** SEM images of perovskite films prepared with precursor solution of a)  $\text{MA}_{0.95}\text{Cs}_{0.05}\text{PbI}_2\text{Br}(\text{SCN})_{0.08}$  and b)  $\text{MA}_{0.85}\text{Cs}_{0.15}\text{PbI}_2\text{Br}(\text{SCN})_{0.08}$ , respectively. c-d) UV-Vis absorption results of perovskite films prepared with precursor solution of  $\text{MA}_{0.95}\text{Cs}_{0.05}\text{PbI}_2\text{Br}(\text{SCN})_{0.08}$ ,  $\text{MA}_{0.90}\text{Cs}_{0.10}\text{PbI}_2\text{Br}(\text{SCN})_{0.08}$  and  $\text{MA}_{0.85}\text{Cs}_{0.15}\text{PbI}_2\text{Br}(\text{SCN})_{0.08}$ , respectively. d) XRD results of the films prepared with precursor solution of  $\text{MA}_{0.95}\text{Cs}_{0.05}\text{PbI}_2\text{Br}(\text{SCN})_{0.08}$  and  $\text{MA}_{0.85}\text{Cs}_{0.15}\text{PbI}_2\text{Br}(\text{SCN})_{0.08}$ , respectively.

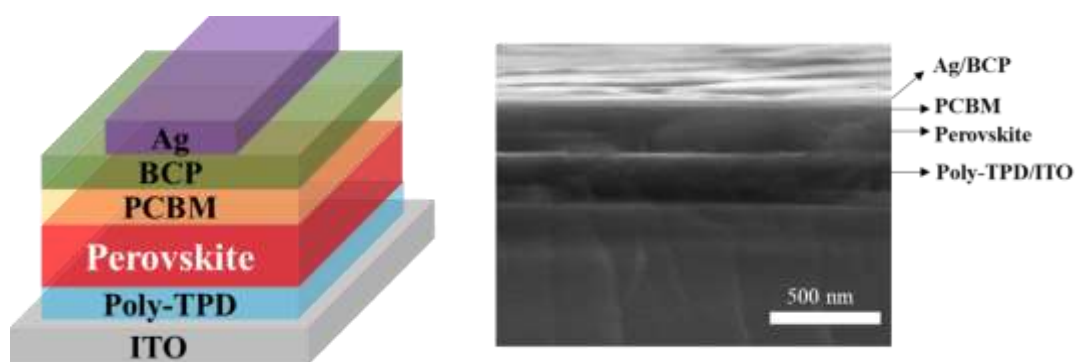

**Figure S5.** Device structure and corresponding cross-section SEM image of the perovskite solar cells in this work.

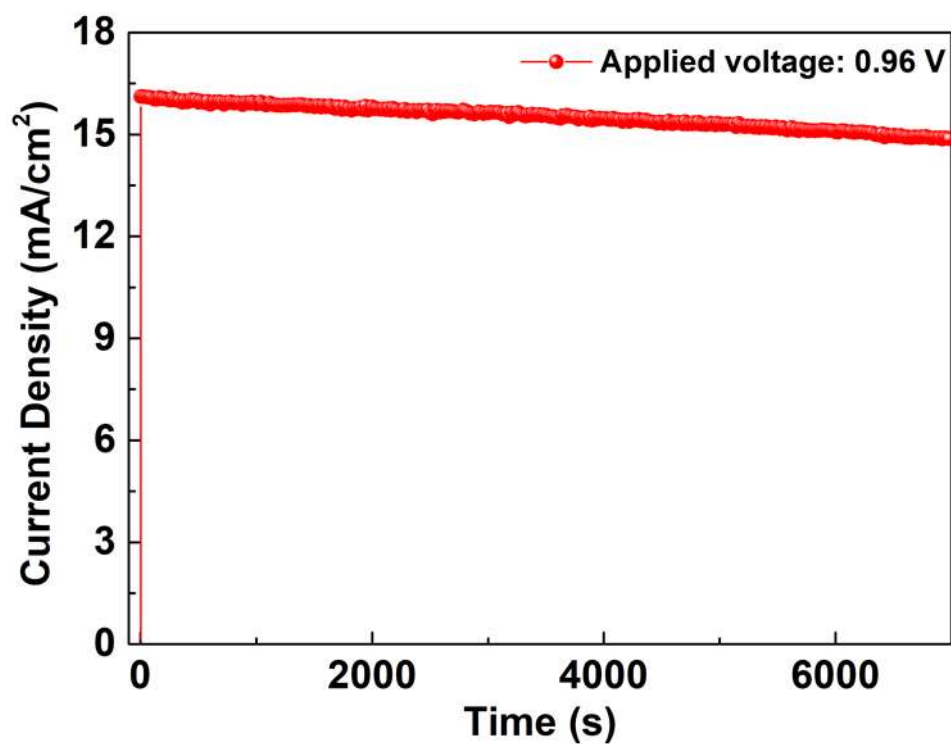

**Figure S6.** Steady-state current density ( $J_{sc}$ ) under AM1.5 illumination at the applied voltage corresponding to the maximum power point (0.96 V) tested under ambient atmosphere without encapsulation.

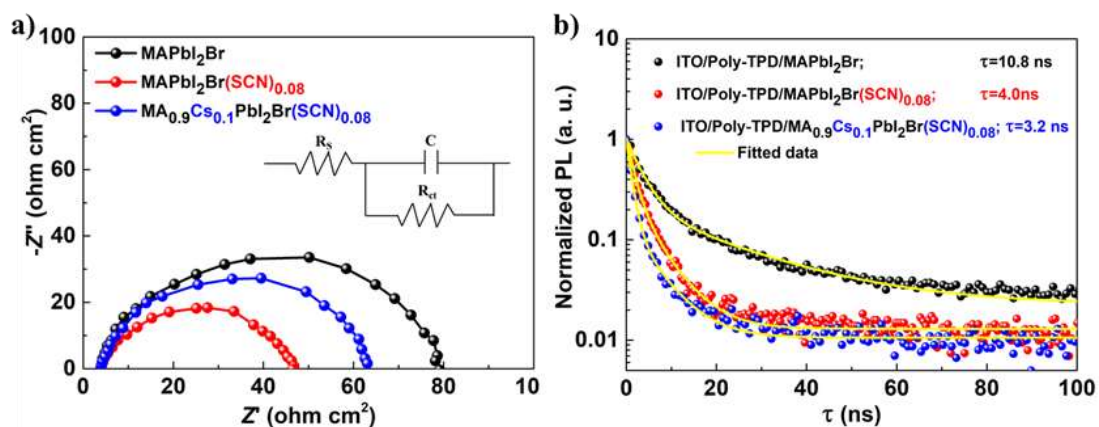

**Figure S7.** EIS spectra of MA<sub>0.9</sub>CS<sub>0.1</sub>PbI<sub>2</sub>Br(SCN)<sub>0.08</sub>, MA<sub>0.9</sub>CS<sub>0.1</sub>PbI<sub>2</sub>Br(SCN)<sub>0.08</sub> and MA<sub>0.9</sub>CS<sub>0.1</sub>PbI<sub>2</sub>Br(SCN)<sub>0.08</sub> based PVSCs measured at open circuit condition ( $V = 1.04$ ,  $1.12$  and  $1.15$  V, respectively).
